# Supplementary material for: Predictive Power of Air Travel and Socio-Economic Data for Early Pandemic Spread
Source: PLOS journal article supplement (doi:10.1371/journal.pone.0012763), 2010-09-15

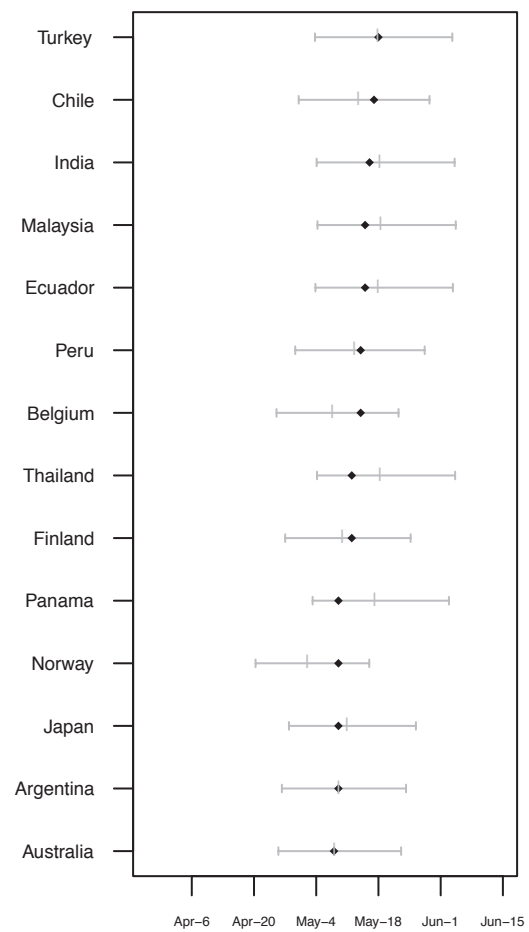

Supplement: S2 (10.1371/journal.pone.0012763.s002) [file journal.pone.0012763.s002]
